# Supplementary material for: Identification of Colletotrichum Species Associated with Blueberry Anthracnose in Sichuan, China
Source: PubMed Central journal article supplement (PMC7559709; doi:10.3390/pathogens9090718), 2020-08-31
Supplement: pathogens-09-00718-s001.pdf [file pathogens-09-00718-s001.pdf]

**Supplementary Table S1.** GenBank accession numbers and source of different strains used in the current study

| species                        | Strain no.  | Host                     | Location     | GenBank accession numbers |                 |                 |                 |                 |
|--------------------------------|-------------|--------------------------|--------------|---------------------------|-----------------|-----------------|-----------------|-----------------|
|                                |             |                          |              | ITS                       | TUB2            | ACT             | GAPDH           | CAL             |
| <i>C. acutatum</i>             | BRIP28519   | <i>Carica papaya</i>     | Australia    | FJ 972601                 | FJ 907443       | FJ 907428       | FJ 972580       | FJ 917510       |
| <i>C. acutatum</i>             | CBS29467    | <i>Carica papaya</i>     | Australia    | FJ 972610                 | FJ 907444       | FJ 907429       | FJ 972581       | FJ 917511       |
| <i>C. boninense</i>            | CBS128547*  | <i>Camellia</i> sp.      | New Zealand  | JQ005159                  | JQ005593        | JQ005507        | JQ005246        | JQ005680        |
| <i>C. boninense</i>            | CBS123755*  | <i>Crinum asiaticum</i>  | Japan        | JQ005153                  | JQ005588        | JQ005501        | JQ005240        | JQ005674        |
| <i>C. cliviae</i>              | CBS 125375  | <i>Clivia miniata</i>    | China        | JX519223                  | JX519249        | JX519240        | JX546611        | -               |
| <i>C. cliviae</i>              | CSSK4*      | <i>Clivia miniata</i>    | China        | GQ485607                  | GQ849440        | GQ856777        | GQ856756        | GQ849464        |
| <i>C. cliviae</i>              | CSSS1       | <i>Clivia miniata</i>    | China        | GU109479                  | GU085869        | GU085861        | GU085868        | GU085864        |
| <i>C. sichuaninense</i>        | LJTJ3       | <i>Capsicum</i> sp.      | China        | KP748193                  | KP823850        | KP823738        | KP823773        | KP823808        |
| <i>C. sichuaninense</i>        | LJTJ16      | <i>Capsicum</i> sp.      | China        | KP748207                  | KP823851        | KP823739        | KP823786        | KP823809        |
| <i>C. sichuaninense</i>        | LJTJ22      | <i>Capsicum</i> sp.      | China        | KP748213                  | KP823852        | KP823740        | KP823792        | KP823810        |
| <i>C. sichuaninense</i>        | LJTJ30      | <i>Capsicum</i> sp.      | China        | KP748221                  | KP823853        | KP823741        | KP823800        | KP823811        |
| <b><i>C. sichuaninense</i></b> | <b>LMT1</b> | <b><i>Blueberry</i></b>  | <b>China</b> | <b>MF543100</b>           | <b>MF471719</b> | <b>MF471703</b> | <b>MF543063</b> | <b>MF471739</b> |
| <i>C. coccodes</i>             | CBS164.49*  | <i>Solanum tuberosum</i> | Netherlands  | HM171678                  | -               | HM171666        | HM171672        | HM171669        |
| <i>C. coccodes</i>             | CBS369.75   | <i>Solanum tuberosum</i> | Netherlands  | HM171679                  | -               | HM171667        | HM171673        | HM171670        |
| <i>C. coccodes</i>             | CPOS1       | <i>Solanum tuberosum</i> | China        | GQ485588                  | GQ849444        | GQ856787        | GQ856744        | HM171670        |
| <i>C. gloeosporioides</i>      | CBS 95397   | <i>Citrus sinensis</i>   | Italy        | FJ972609                  | FJ907445        | FJ 907430       | FJ 972582       | FJ 917512       |
| <i>C. gloeosporioides</i>      | CBS953.97*  | <i>Citrus sinensis</i>   | Italy        | GQ485605                  | GQ849434        | GQ856782        | GQ856762        | GQ849452        |
| <i>C. gloeosporioides</i>      | IMI356878*  | <i>Citrus sinensis</i>   | Italy        | JX010152                  | JX010445        | JX009531        | JX010056        | JX009731        |
| <i>C. gloeosporioides</i>      | CORCG5      | <i>Vanda</i> sp.         | China        | HM034809                  | HM034811        | HM034801        | HM034807        | HM034803        |

|                                |              |                            |              |                 |                 |                 |                 |                 |
|--------------------------------|--------------|----------------------------|--------------|-----------------|-----------------|-----------------|-----------------|-----------------|
| <i>C.gloeosporioides</i>       | LJTJ13       | <i>Capsicum</i> sp.        | China        | KP748204        | KP823863        | KP823751        | KP823783        | KP823821        |
| <i>C. scovillei</i>            | LJTJ35       | <i>Capsicum</i> sp.        | China        | KP748226        | KP823849        | KP823735        | KP823805        | KP823807        |
| <i>C. scovillei</i>            | LJTJ42       | <i>Capsicum</i> sp.        | China        | KP943572        | KP943588        | KP943562        | KP943516        | KP943582        |
| <i>C. scovillei</i>            | LJTJ61       | <i>Capsicum</i> sp.        | China        | KP943573        | KP943589        | KP943563        | KP943517        | KP943583        |
| <i>Monilochaetes infuscans</i> | CBS869.96    | Unknown                    | Unknown      | JQ005780        | JQ005864        | JQ005843        | -               | -               |
| <i>C. karstii</i>              | CORCG6*      | <i>Vanda</i> sp.           | China        | HM585409        | HM585428        | HM581995        | HM585391        | HM582013        |
| <i>C. karstii</i>              | CORCK1       | <i>Calanthe</i>            | China        | HM585406        | HM585424        | HM581991        | HM585387        | HM582010        |
| <i>C. karstii</i>              | GM44L01      | <i>Annona muricata</i>     | Colombia     | KC512141        | KC512204        | KC512183        | KC506413        | KC512225        |
| <b><i>C. karstii</i></b>       | <b>LMT25</b> | <b>Blueberry</b>           | <b>China</b> | <b>MF543103</b> | <b>MF471722</b> | <b>MF471706</b> | <b>MF543066</b> | -               |
| <b><i>C. karstii</i></b>       | <b>LMT7</b>  | <b>Blueberry</b>           | <b>China</b> | <b>MF543102</b> | <b>MF471721</b> | <b>MF471705</b> | <b>MF543065</b> | <b>MF471741</b> |
| <i>C. nymphaeae</i>            | CLOK3        | <i>Eriobotrya japonica</i> | China        | KJ534689        | KJ534680        | KJ534737        | KJ534755        | KJ534725        |
| <i>C. nymphaeae</i>            | CBS115408*   | -                          | -            | JQ948212.1      | JQ949863.1      | JQ949533.1      | JQ948542.1      | -               |
| <i>C. nymphaeae</i>            | CBS515.78    | <i>Nymphaea alba</i>       | Netherlands  | JQ948197        | JQ949848        | JQ949518        | JQ948527        | -               |
| <b><i>C. nymphaeae</i></b>     | <b>LMT13</b> | <b>Blueberry</b>           | <b>China</b> | <b>MF543101</b> | <b>MF471720</b> | <b>MF471704</b> | <b>MF543064</b> | <b>MF471740</b> |
| <i>C. brevisporum</i>          | LC0600*      | <i>Neoregalia</i> sp.      | Thailand     | JN050238        | JN050244        | JN050216        | JN050227        | JN050222        |
| <i>C. brevisporum</i>          | LC0870       | <i>Pandanus pygmaeus</i>   | Thailand     | JN050239        | JN050245        | JN050217        | JN050228        | -               |
| <i>C. brevisporum</i>          | LJTJ24       | <i>Capsicum</i> sp.        | China        | KP748215        | -               | KP823736        | KP823794        | -               |
| <i>C. siamense</i>             | LJTJ5        | <i>Capsicum</i> sp.        | China        | KP748195        | KP823868        | KP823756        | KP823775        | KP823825        |
| <i>C. siamense</i>             | LJTJ7        | <i>Capsicum</i> sp.        | China        | KP748198        | KP823869        | KP823757        | KP823777        | KP823826        |
| <b><i>C. siamense</i></b>      | <b>LMT15</b> | <b>Blueberry</b>           | <b>China</b> | <b>MF543104</b> | <b>MF471723</b> | <b>MF471707</b> | <b>MF543067</b> | -               |
| <b><i>C. siamense</i></b>      | <b>LMT24</b> | <b>Blueberry</b>           | <b>China</b> | <b>MF543106</b> | <b>MF471724</b> | <b>MF471708</b> | <b>MF543068</b> | <b>MF471742</b> |
| <b><i>C. siamense</i></b>      | <b>LMT33</b> | <b>Blueberry</b>           | <b>China</b> | <b>MF543107</b> | <b>MF471725</b> | <b>MF471709</b> | <b>MF543069</b> | <b>MF471743</b> |
| <b><i>C. siamense</i></b>      | <b>LMT35</b> | <b>Blueberry</b>           | <b>China</b> | <b>MF543108</b> | <b>MF471726</b> | <b>MN311515</b> | <b>MF543072</b> | <b>MF471744</b> |
| <i>C. siamense</i>             | C1315.2*     | <i>coffea arabica</i>      | Thailand     | JX010171        | JX010404        | JX009518        | JX009924        | -               |

|                      |           |                         |              |                 |                 |                 |                 |                 |
|----------------------|-----------|-------------------------|--------------|-----------------|-----------------|-----------------|-----------------|-----------------|
| <i>C. siamense</i>   | C1263.11* | <i>Persea americana</i> | South Africa | JX010162        | JX010393        | JX009506        | JX010051        | JX009703        |
| <i>C. siamense</i>   | LMT34     | <i>Blueberry</i>        | China        | MN295188        | MN295203        | <b>MN311500</b> | <b>MF543070</b> | -               |
| <i>C. siamense</i>   | LMT19     | <i>Blueberry</i>        | China        | <b>MF543105</b> | <b>MN295202</b> | -               | <b>MF543071</b> | -               |
| <i>C. kahawae</i>    | C1275.1*  | <i>coffee arabica</i>   | Angola       | JX010234        | JX010435        | JX009474        | JX010040        | JX009638        |
| <i>C. kahawae</i>    | Q025*     | <i>Blackberry</i>       | Colombia     | KJ001121        | KJ001125        | KJ001103        | KJ001114        | KJ001107        |
| <i>C. kahawae</i>    | C1252.12  | <i>Kunzea ericoides</i> | New Zealand  | JX010227        | JX010427        | JX009473        | JX009904        | -               |
| <i>C. kahawae</i>    | LMT4      | <i>Blueberry</i>        | China        | MF543109        | MF471727        | MF471710        | MF543073        | MF471745        |
| <i>C. kahawae</i>    | LMT11     | <i>Blueberry</i>        | China        | MF543110        | MF471728        | MF471711        | MF543074        | MF471746        |
| <i>C. fructicola</i> | LMT3      | <i>Blueberry</i>        | China        | MF543111        | MF471729        | MF471712        | MF543075        | MF471747        |
| <i>C. fructicola</i> | LMT5      | <i>Blueberry</i>        | China        | MF543112        | MF471730        | MF471713        | MF543076        | MF471748        |
| <i>C. fructicola</i> | LMT6      | <i>Blueberry</i>        | China        | MF543113        | MF471731        | MF471714        | MF543077        | MF471749        |
| <i>C. fructicola</i> | LMT9      | <i>Blueberry</i>        | China        | MF543114        | MF471732        | MF471715        | MF543079        | MF471750        |
| <i>C. fructicola</i> | LMT12     | <i>Blueberry</i>        | China        | MF543115        | MF471733        | MF471716        | MF543081        | MF471751        |
| <i>C. fructicola</i> | LMT14     | <i>Blueberry</i>        | China        | MF543116        | MF471734        | MF471717        | MF543082        | MF471752        |
| <i>C. fructicola</i> | LMT31     | <i>Blueberry</i>        | China        | MF543117        | MF471735        | MF471718        | MF543094        | -               |
| <i>C. fructicola</i> | LMT36     | <i>Blueberry</i>        | China        | MF543118        | MF471736        | MN311516        | MF543096        | MF471753        |
| <i>C. fructicola</i> | LMT38     | <i>Blueberry</i>        | China        | MF543119        | MF471737        | MN311517        | MF543097        | MF471754        |
| <i>C. fructicola</i> | LMT39     | <i>Blueberry</i>        | China        | MF543120        | MF471738        | MN311518        | MF543098        | MF471755        |
| <i>C. fructicola</i> | LMT41     | <i>Blueberry</i>        | China        | MF543121        | MN295218        | MN311514        | MF543099        | MF471756        |
| <i>C. fructicola</i> | LMT8      | <i>Blueberry</i>        | China        | MN295197        | MN295212        | MN311509        | MF543078        | -               |
| <i>C. fructicola</i> | LMT10     | <i>Blueberry</i>        | China        | MN295192        | MN295207        | MN311504        | MF543080        | <b>MN328264</b> |
| <i>C. fructicola</i> | LMT16     | <i>Blueberry</i>        | China        | MN295198        | MN295213        | MN311510        | MF543083        | -               |
| <i>C. fructicola</i> | LMT17     | <i>Blueberry</i>        | China        | MF543113        | MN295214        | -               | MF543084        | -               |
| <i>C. fructicola</i> | LMT18     | <i>Blueberry</i>        | China        | MN295195        | MN295210        | MN311507        | MF543085        | -               |

|                         |            |                            |          |          |          |          |          |          |
|-------------------------|------------|----------------------------|----------|----------|----------|----------|----------|----------|
| <i>C. fruticicola</i>   | LMT20      | <i>Blueberry</i>           | China    | MN295191 | MN295206 | MN311503 | MF543086 | MN328263 |
| <i>C. fruticicola</i>   | LMT21      | <i>Blueberry</i>           | China    | MN295189 | MN295204 | MN311501 | MF543087 | -        |
| <i>C. fruticicola</i>   | LMT22      | <i>Blueberry</i>           | China    | MN295196 | MN295211 | MN311508 | MF543088 | -        |
| <i>C. fruticicola</i>   | LMT26      | <i>Blueberry</i>           | China    | MN295190 | MN295205 | MN311502 | MF543089 | MN328262 |
| <i>C. fruticicola</i>   | LMT27      | <i>Blueberry</i>           | China    | MN295193 | MN295208 | MN311505 | MF543090 | MN328265 |
| <i>C. fruticicola</i>   | LMT28      | <i>Blueberry</i>           | China    | MN295201 | MN295217 | MN311513 | MF543091 | -        |
| <i>C. fruticicola</i>   | LMT29      | <i>Blueberry</i>           | China    | MN295194 | MN295209 | MN311506 | MF543092 | MN328266 |
| <i>C. fruticicola</i>   | LMT30      | <i>Blueberry</i>           | China    | MN295199 | MN295215 | MN311511 | MF543093 | -        |
| <i>C. fruticicola</i>   | LMT32      | <i>Blueberry</i>           | China    | MN295200 | MN295216 | MN311512 | MF543095 | -        |
| <i>C. fruticicola</i>   | C1275.7    | <i>Ficus edulis</i>        | Germany  | JX010181 | JX010400 | JX009495 | JX009923 | JX009671 |
| <i>C. fruticicola</i>   | C1316.21   | <i>Tetragastris</i>        | Panama   | JX010173 | JX010409 | JX009581 | JX010032 | JX009674 |
| <i>C. fruticicola</i>   | FAFU01     | <i>Jute</i>                | China    | KT439373 | KT439339 | KT439346 | KT439359 | KT439352 |
| <i>C. fruticicola</i>   | BPDI16*    | <i>coffea arabica</i>      | Thailand | FJ972603 | FJ907441 | FJ907426 | FJ972578 | -        |
| <i>C. fruticicola</i>   | LJTJ2      | <i>Capsicum</i> sp.        | China    | KP748192 | KP823854 | KP823742 | KP823772 | KP823812 |
| <i>C. chrysophilum</i>  | CMM4268*   | <i>Musa</i> sp.            | Brazil   | KX094252 | KX094285 | KX093982 | KX094183 | KX094063 |
| <i>C. chrysophilum</i>  | CMM4292    | <i>Musa</i> sp.            | Brazil   | KX094248 | KX094284 | KX093981 | KX094182 | KX094062 |
| <i>C. chrysophilum</i>  | CMM4387    | <i>Musa</i> sp.            | Brazil   | KX094246 | KX094281 | KX093980 | KX094181 | KX094061 |
| <i>C. chrysophilum</i>  | CMM4394    | <i>Musa</i> sp.            | Brazil   | KX094239 | KX094282 | KX093979 | KX094179 | KX094059 |
| <i>C. noveboracense</i> | AFKH109*   | <i>Apple</i>               | Columbia | MN646685 | MN640569 | MN640565 | MN640567 | MN640566 |
| <i>C. noveboracense</i> | AFK220     | <i>Apple</i>               | Ulster   | MN625451 | MN622861 | MN622839 | MN689180 | MN622851 |
| <i>C. noveboracense</i> | AFK423     | <i>Apple</i>               | Ulster   | MN708219 | MN701194 | MN701181 | MN741085 | MN701191 |
| <i>C. fioriniae</i>     | CBS128517* | -                          | USA      | MH865005 | JQ949943 | JQ949613 | JQ948622 | -        |
| <i>C. nupharicola</i>   | CBS470.96* | <i>Nuphar lutea</i> subsp. | USA      | JX010187 | JX010398 | JX009437 | JX009972 | JX009663 |
| <i>C. nupharicola</i>   | CBS472.96  | <i>Nymphaea odorata</i>    | USA      | JX010188 | JX010399 | JX009582 | JX010031 | JX009662 |

|                         |            |                           |             |          |          |          |          |          |
|-------------------------|------------|---------------------------|-------------|----------|----------|----------|----------|----------|
| <i>C.horii</i>          | ICMP10492* | <i>Diospyros kaki</i>     | Japan       | -        | JQ071915 | JQ071911 | JX009964 | JX009604 |
| <i>C.horii</i>          | ICMP17970  | <i>Diospyros kaki</i>     | Japan       | JX010213 | -        | JX009467 | -        | -        |
| <i>C.horii</i>          | ICMP17968  | <i>Diospyros kaki</i>     | China       | JX010212 | JX010378 | JX009547 | -        | JX009606 |
| <i>C.tropicale</i>      | ICMP18653* | <i>Theobroma cacao</i>    | Panama      | JX010264 | JX010407 | JX009489 | JX010007 | JX009719 |
| <i>C.tropicale</i>      | ICMP18672  | <i>Litchi chinensis</i>   | Japan       | JX010275 | JX010396 | JX009480 | JX010020 | JX009722 |
| <i>C.tropicale</i>      | ICMP18651  | <i>Annona muricata</i>    | Panama      | JX010277 | -        | JX009570 | JX010014 | JX009720 |
| <i>C.asianum</i>        | ICMP18580* | <i>Coffea arabica</i>     | Thailand    | FJ972612 | JX010406 | JX009584 | JX010053 | FJ917506 |
| <i>C.asianum</i>        | ICMP18603  | <i>Mangifera indica</i>   | Philippines | JX010195 | -        | JX009579 | JX009938 | JX009725 |
| <i>C.asianum</i>        | ICMP18605  | <i>Mangifera indica</i>   | Thailand    | JX010194 | -        | JX009465 | JX010021 | JX009726 |
| <i>C.musae</i>          | ICMP19119* | <i>Musa sp</i>            | USA         | JX010146 | HQ596280 | JX009433 | JX010050 | JX009742 |
| <i>C.musae</i>          | ICMP18600  | <i>Musa sp</i>            | Philippines | JX010144 | -        | JX009556 | JX010038 | JX009686 |
| <i>C.musae</i>          | ICMP12930  | <i>Musa sp</i>            | New Zealand | JX010141 | -        | JX009566 | JX009986 | JX009685 |
| <i>C.musae</i>          | ICMP18701  | <i>Musa sp</i>            | Philippines | JX010145 | -        | JX009551 | JX010047 | JX009687 |
| <i>C.aenigma</i>        | ICMP18608* | <i>Persea americana</i>   | Israel      | JX010244 | JX010389 | JX009443 | JX010044 | JX009683 |
| <i>C.aenigma</i>        | ICMP18686  | <i>Pyrus pyrifolia</i>    | Japan       | JX010243 | JX010390 | JX009519 | JX009913 | JX009684 |
| <i>C.aenigma</i>        | GA415      | <i>Avocado</i>            | Israel      | KX620327 | KX620360 | KX620164 | KX620261 | KX620226 |
| <i>C.queenslandicum</i> | ICMP1778*  | <i>Carica papaya</i>      | Australia   | JX010276 | JX010414 | JX009447 | JX009934 | JX009691 |
| <i>C.queenslandicum</i> | ICMP1780   | <i>Carica sp.</i>         | Australia   | JX010186 | -        | JX009504 | JX010010 | JX009693 |
| <i>C.queenslandicum</i> | ICMP12564  | <i>Persea americana</i>   | Australia   | JX010184 | -        | JX009573 | JX009919 | JX009692 |
| <i>C.cymbidiicola</i>   | MI347923*  | <i>Cymbidium sp.</i>      | Australia   | JQ005166 | JQ005600 | JQ005514 | JQ005253 | JQ005687 |
| <i>C.cymbidiicola</i>   | ICMP18584  | <i>Cymbidium sp.</i>      | New Zealand | JQ005167 | JQ005601 | JQ005515 | JQ005254 | JQ005688 |
| <i>C.cymbidiicola</i>   | CBS130241  | <i>Dacrydium</i>          | New Zealand | JQ005236 | JQ005670 | JQ005584 | JQ005323 | JQ005757 |
| <i>C.petchii</i>        | CBS378.94* | <i>Dracaena marginata</i> | Italy       | JQ005223 | JQ005657 | JQ005571 | JQ005310 | JQ005744 |
| <i>C.petchii</i>        | CBS118193  | <i>Dracaena sanderana</i> | China       | JQ005227 | JQ005661 | JQ005575 | JQ005314 | JQ005748 |

|                     |            |                            |          |                 |          |          |          |          |
|---------------------|------------|----------------------------|----------|-----------------|----------|----------|----------|----------|
| <i>C. petchii</i>   | CBS118774  | <i>Dracaena sanderana</i>  | China    | JQ005225        | JQ005659 | JQ005573 | JQ005312 | JQ005746 |
| <i>C. cuscatae</i>  | CPC18873*  | <i>Cuscuta sp.</i>         | Dominica | JQ948195        | JQ949846 | JQ949516 | JQ948525 | -        |
| <i>C. godetiae</i>  | CBS133.44* | <i>Clarkia hybrida, cv</i> | Denmark  | JQ948402        | JQ950053 | JQ949723 | JQ948733 | -        |
| <i>C. godetiae</i>  | CBS160.50  | <i>Citrus aurantium</i>    | -        | JQ948406        | JQ950057 | JQ949727 | JQ948737 | -        |
| <i>C. godetiae</i>  | IMI351248  | <i>Ceanothus sp.</i>       | UK       | JQ948433        | JQ950084 | JQ949754 | JQ948764 | -        |
| <i>C. viniferum</i> | C4         | <i>Vitis vinifera</i>      | China    | KF156848        | KF288968 | KF377516 | KF377479 | -        |
| <i>C. viniferum</i> | G141-1     | <i>Vitis vinifera</i>      | China    | <b>KF156847</b> | KF288967 | KF377514 | KF377477 | -        |
| <i>C. viniferum</i> | B12        | <i>Vitis vinifera</i>      | China    | KF156850        | KF288969 | KF377518 | KF377481 | -        |
| <i>C. viniferum</i> | G12-1      | <i>Vitis vinifera</i>      | China    | KF156846        | KF288962 | KF377513 | KF377476 | -        |

Note: ITS=internal transcribed spacer regions, TUB2=  $\beta$ -tubulin, ACT=actin, GAPDH=glyceraldehyde-3-phosphate dehydrogenase, CAL=calmodulin.

Asterisks (\*) indicate ex-holotype or ex-epitype cultures. Isolates from this study are shown in bold.

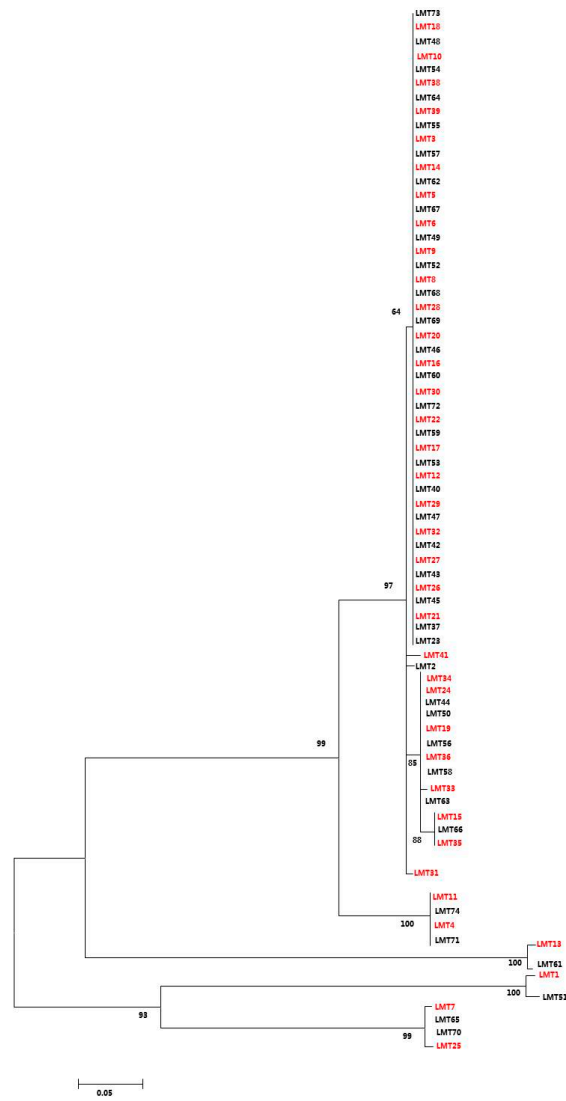

**Figure S1.** A maximum parsimony tree based on partial GAPDH gene sequences from 74 *Colletotrichum* isolates. Parsimony bootstrap values of more than 50%

are shown at the nodes. Isolates selected for subsequent phylogenetic analyses are highlighted in red.



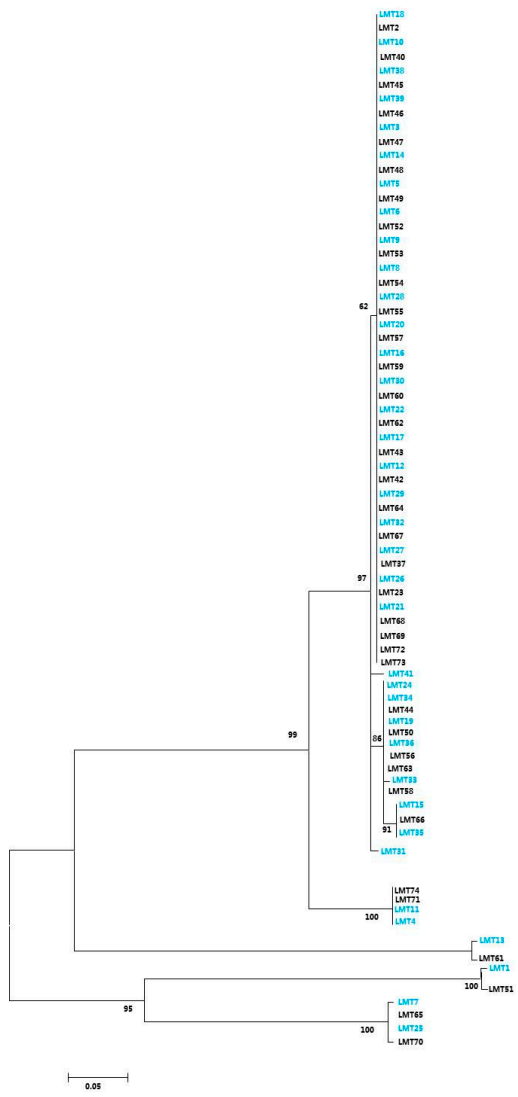

**Figure S2.** A maximum likelihood tree based on partial GAPDH gene sequences from 74 *Colletotrichum* isolates. Parsimony bootstrap values of more than 50% are shown at the nodes. Isolates selected for subsequent phylogenetic analyses are highlighted in blue.



**Figure S3.** Phylogenetic tree generated from maximum likelihood analysis based on GAPDH, ITS, TUB2, ACT and CAL gene sequences. Parsimony bootstrap values of more than 50% are shown at the nodes. Isolates from this study are shown in bold, and the species of the same color belong to the same complex species of *Colletotrichum*. The tree is rooted with *Monilochaetes infuscans*. Detailed information is provided in Table S1.
